## Metabolic function in *Drosophila melanogaster* in response to hypoxia and pure oxygen

Wayne A. Van Voorhies

Molecular Biology Program, MSC 3MLS, New Mexico State University, Las Cruces, NM 88003, USA

wvanvoor@nmsu.edu

Accepted 18 June 2009

### SUMMARY

This study examined the metabolic response of *Drosophila melanogaster* exposed to O<sub>2</sub> concentrations ranging from 0 to 21% and at 100%. The metabolic rate of flies exposed to graded hypoxia remained nearly constant as O<sub>2</sub> tensions were reduced from normoxia to ~3 kPa. There was a rapid, approximately linear reduction in fly metabolic rate at P<sub>O<sub>2</sub></sub>s between 3 and 0.5 kPa. The reduction in metabolic rate was especially pronounced at P<sub>O<sub>2</sub></sub> levels <0.5 kPa, and at a P<sub>O<sub>2</sub></sub> of 0.1 kPa fly metabolic rate was reduced ~10-fold relative to normoxic levels. The metabolic rate of flies exposed to anoxia and then returned to normoxia recovered to pre-anoxic levels within 30 min with no apparent payment of a hypoxia-induced oxygen debt. Flies tolerated exposure to hypoxia and/or anoxia for 40 min with nearly 100% survival. Fly mortality increased rapidly after 2 h of anoxia and >16 h exposure was uniformly lethal. Flies exposed to pure O<sub>2</sub> for 24 h showed no apparent alteration of metabolic rate, even though such O<sub>2</sub> tensions should damage respiratory enzymes critical to mitochondria function. Within a few hours the metabolic rate of flies recovering from exposure to repeated short bouts of anoxia was the same as flies exposed to a single anoxia exposure.

Key words: metabolic rate, reperfusion injury, critical oxygen tension, hypoxic response, hyperoxia.

### INTRODUCTION

Understanding how organisms respond to, and tolerate low O<sub>2</sub> tensions has become an area of intense scientific study. Much of this interest is due to the recent identification of a widely conserved set of genes, termed hypoxia inducible factors (HIF), that sense and respond to hypoxia (Kaelin, 2005; Semenza, 2004). In addition to providing basic insights into how organisms cope with reduced levels of O<sub>2</sub>, understanding the hypoxic response has important medical ramifications in the treatment of ischemic injuries induced by events such as stroke or cardiac failure, and in the treatment of cancer (Dayan et al., 2006; Hochachka et al., 2002; Murphy and Steenbergen, 2008; Pouyssegur et al., 2006; Yun et al., 2002). Studies using model organisms such as the nematode *Caenorhabditis elegans* and *Drosophila melanogaster*, have provided valuable insights into the underlying molecular and physiological responses to hypoxia (Bishop et al., 2004; Centanin et al., 2005; Chen et al., 2004; Epstein et al., 2001).

Oxygen is required for all known metazoans to complete their life cycle (Fenchel and Finlay, 1995; Jensen, 1995). Under aerobic conditions, animals utilize O<sub>2</sub> in the mitochondrial electron transport chain for oxidative phosphorylation and the synthesis of adenosine triphosphate (ATP) (Saraste, 1999). Metazoans have evolved a variety of mechanisms to either supply O<sub>2</sub> to cells, or to compensate for reduced O<sub>2</sub> levels when faced with fluctuations in O<sub>2</sub> levels. Factors that expose organisms to low O<sub>2</sub> tensions include environmental events, such as decreased O<sub>2</sub> partial pressures with increased altitude, or chemical reactions that remove or displace O<sub>2</sub> in aquatic and terrestrial environments (Baumgartl et al., 1994; Drew, 1992; Hoback and Stanley, 2001). Hypoxia can also occur at the cellular level during heavy exercise, and during physiological insults, such as strokes or heart attack, which limit perfusion (Hochachka, 1998). Although the requirement for O<sub>2</sub> is absolute,

animals do have the ability to tolerate varying degrees and periods of hypoxia (Hochachka, 1980).

Organisms respond to reduced O<sub>2</sub> levels with adaptations that include increasing rates of glycolytic flux, reducing metabolic rate and modulating the levels of hypoxia inducible factors (HIFs) that regulate hypoxia-sensitive genes (Baumgartl et al., 1994; Brooks and Storey, 1997; Chandel and Schumacker, 2000; Clegg, 1997; Johansson et al., 1995). Even with such modifications O<sub>2</sub> levels can still become limiting to cellular function, forcing the organism to withstand the harmful effects of hypoxia or anoxia (Hand, 1998). At the cellular level hypoxia can rapidly induce a wide range of potentially detrimental physiological effects that include alterations in levels of nicotinamide adenine dinucleotide hydride (NADH), adenosine diphosphate (ADP), adenosine monophosphate (AMP), inorganic phosphate, ATP and pH (Foe and Alberts, 1985).

The deleterious effects of hypoxia are thought to be mediated mainly by reducing the rate of ATP production. This results in the rapid failure of ATP-driven ion pumps, which allows the unopposed flow of ions into the cell causing rapid membrane depolarization. The resulting unregulated Ca<sup>2+</sup> influx causes a wide array of cellular disruptions including spontaneous stimulation of phospholipases, proteases and nucleases (Choi, 2005; Lutz and Nilsson, 1997; Murphy and Steenbergen, 2008; Storey and Storey, 1990; Thompson et al., 2006). Toxic effects of hypoxia also include neuron excitotoxicity, free radical damage, inflammation and immune system over-activation (Bickler et al., 2004).

These hypoxia-induced changes at the cellular level result in alterations in physiological function of the organism. At the level of the whole organism two well-studied indicators of the effects of hypoxia are the O<sub>2</sub> tension at which metabolic rate begins to be reduced, and how well an organism can survive a complete lack of O<sub>2</sub>. The point at which a reduction in metabolic rate occurs is

commonly referred to as the critical oxygen tension ( $P_c$ ). This value can vary from normoxic  $O_2$  tensions of 21 kPa in frog muscle to 1 kPa or less in some invertebrates (Boutillier and St Pierre, 2002; Holter and Spangenberg, 1997; Taylor and Moore, 1995). Whereas exposures to low  $O_2$  levels are eventually lethal to all metazoans, the length of time that organisms can tolerate anoxic and/or hypoxic conditions varies enormously. A few minutes without  $O_2$  can be lethal to most vertebrates (Arthur et al., 1997; Hermes-Lima and Zenteno-Savin, 2002), whereas copepod eggs buried in anoxic lake sediments remained viable for up to 332 years (Hairston et al., 1995; Marcus et al., 1994). Although some animals can survive long periods of anoxia (Hand, 1998; Hand and Hardewig, 1996; Jackson, 2000; Lutz and Nilsson, 1997), the great majority of free-living, eukaryotic organisms cannot withstand more than 24 h of anoxia (Clegg, 1997).

Elevated  $O_2$  levels can also be toxic to organisms. Hyperoxia toxicity is thought to be caused by an increased production of free radicals and hydrogen peroxide generation (Joenje, 1989; Paget et al., 1987). Among other effects, hyperoxia can disrupt metabolic pathways and reduce respiration rates (Gille and Joenje, 1992; Jamieson, 1989; Schoonen et al., 1990). Humans exposed to pure  $O_2$  for more than 24 h begin to show compromised lung function and exposure to several days of pure  $O_2$  is lethal to many mammals and insects (Mockett et al., 2001; Smith and Gottlieb, 1975).

Insects have long been used to study respiration physiology and the response of organisms to varied  $O_2$  tensions (Chadwick and Gilmour, 1940; Ellenby, 1953; Fenn et al., 1967; Harrison et al., 2006; Hetz and Bradley, 2005; Hoback and Stanley, 2001; Jarecki et al., 1999; Lighton and Schilman, 2007). A major advantage in the use of insects to study physiological responses to varying  $O_2$  levels is that the tissues in insects are typically directly exposed to the ambient  $O_2$  tensions. This contrasts with many animals (e.g. mammals) that rely on respiratory pigments and a circulatory system to meet gas exchange requirements. This means the  $O_2$  tensions that cells are exposed to can be quite different from ambient levels, particularly at increased  $O_2$  tensions (Massabuau, 2003).

The well-characterized development and genetics of *Drosophila* make it particularly useful in studies of hypoxia tolerance (Douglas et al., 2003; Haddad, 2006). As in most insects, gas exchange in *Drosophila* occurs via pairs of spiracles on the segments of the thorax and abdomen from where branching tracheae penetrate the tissues terminating in blind-ended tracheoles that deliver  $O_2$  directly from the atmosphere to the organs and tissues. Ambient gases enter into *Drosophila* through spiracles located laterally along the thorax and abdomen. Small muscles control valves that regulate the flow of air in response to factors such as humidity and metabolic demand (Heymann and Lehmann, 2006; Lehmann et al., 2000; Wilson et al., 2005). This study examined the metabolic response of *D. melanogaster* to a wide range of  $O_2$  concentrations. As well as better characterizing the response of *Drosophila* to hypoxia, such studies allow changes in the physiology of the whole organism to be compared with studies on the effects of varied  $O_2$  tensions on gene expression patterns.

## MATERIALS AND METHODS

### Exposure to graded hypoxia

The metabolic response of a common laboratory wild-type strain of *Drosophila melanogaster* Meigen (strain  $w^{1118}$ ) to varying  $O_2$  tensions was assayed in groups of approximately 100 mixed-sex, 4- to 8-day-old post-emergent flies. Previous studies have shown that male and female flies appear to respond equally to hypoxia in physiological and behavioral assays (Krishnan et al., 1997). Fly

stocks were maintained on a standard yeast-cornmeal-agar medium at 24°C in 50 ml glass vials. The day before the flow-through respirometry measurements were made the flies were sedated with light  $CO_2$  anesthesia and their sex determined. Flies recovered from this  $CO_2$  exposure for 24 h before the start of metabolic measurements.

On the day of the metabolic measurement flies were immobilized with a humidified stream of  $N_2$  and placed in two 25 ml glass metabolic chambers at a density of around 100 flies per chamber. Exposing flies to this short period of anoxia does not significantly affect their subsequent metabolic rate (Van Voorhies et al., 2004). The chambers were then flushed with  $CO_2$ -free,  $H_2O$ -saturated air at 20 ml min<sup>-1</sup> (STPD).  $CO_2$  was removed from the inflowing gas stream with an Ascarite gas scrubbing column. Gas flow into the chambers was regulated with a mass flow controller (Sierra Instruments, Monterey, CA, USA) and a rotameter (Gilmont Instruments, Barrington, IL, USA) directly calibrated against a mass flow controller before each experiment. To prevent the flies from being stressed by low humidity conditions, the gas stream was rehydrated before entering the metabolic chamber by passing it through a series of glass syringes filled with sterile  $H_2O$  and cotton wool. After flowing through the metabolic chamber, water was removed from the air stream with magnesium perchlorate filters before entering the  $CO_2$  and  $O_2$  analyzers. The water vapor content of the air stream entering the metabolic chamber was at essentially 100% RH (18.7 mg  $H_2O$  l<sup>-1</sup>) and contained 1–2 p.p.m.  $CO_2$  as assayed with a Li-Cor 6262  $CO_2/H_2O$  analyzer (Lincoln, NE, USA).

The small amount of  $CO_2$  produced by outgassing from the water-filled syringes was subtracted from the final metabolic reading. Metabolic chambers were maintained at room temperature (23±1°C) as monitored by a Hobo data logger (Bourne, MA, USA). At the end of the collection of metabolic data flies were frozen at -80°C and weighed on a Sartorius M2P microbalance (Sartorius AG, Göttingen, Germany). The weight of flies stored at -80°C is stable for >1 year (Van Voorhies et al., 2004).

Oxygen and carbon dioxide concentrations were analyzed at a 2 s sampling interval beginning 10 min after the flies were sealed in the chambers. Data were recorded using Sable Systems DATACAN data acquisition hardware and software (Sable Systems, Las Vegas, NV, USA). A group of ~100 flies produced around a 0.02%  $CO_2$  enrichment of the air stream under normoxic conditions. To normalize for the slight differences in the initial metabolic rates between the different groups of flies, the pre-hypoxic metabolic rate of each group was given a relative value of 1.00. The metabolic rates of two experimental groups of flies were measured simultaneously using a Li-Cor 6251, and 6262 analyzer operated independently of each other. The gas stream then fed into a dual channel Oxzilla fuel-cell  $O_2$  analyzer (Sable Systems) to measure  $O_2$  concentration. Data from the  $CO_2$  and  $O_2$  analyzers were lag corrected to compensate for the time required for the gas sample to flow from the metabolic chambers to the analyzers. The  $O_2$  concentration of the inflowing airstream would have been reduced by the metabolic consumption of  $O_2$  by the flies. However, even at their maximum metabolic rate a group of flies depleted the inflowing air by ~0.02 kPa so this would have a minor effect on the  $O_2$  level. The  $CO_2$  gas analysis system was set to zero daily against  $CO_2$ -free air, and calibrated regularly with a 51 p.p.m. certified gas standard (Air Products, Long Beach, CA, USA). The  $O_2$  analyzer was calibrated daily with well-mixed atmospheric air scrubbed of  $H_2O$  with a column of magnesium perchlorate.

After allowing the flies to equilibrate in the chambers for ~1 h, a stream of  $N_2$  gas (>99.9% purity) was mixed into a 2 l glass mixing

flask leading into the metabolic chamber. Over the course of ~2 h the O<sub>2</sub> level in the air stream leading to the experimental group was reduced from 19 to 2 kPa and after 4 h reached <0.1 kPa. Flies were then exposed to 45 min of anoxia by passing pure N<sub>2</sub> directly into the metabolic chambers. At the end of this period atmospheric air was introduced into the mixing flask. Data were collected from six independent groups with two groups measured on three separate occasions ( $N=6$ ).

Each experiment also included two to four control groups of 15–20 flies that were exposed to normoxic conditions. Because the gas analyzers were in continuous use in monitoring the hypoxic groups, the CO<sub>2</sub> production of the control groups could only be assayed immediately after the control flies were placed in the metabolic chambers and after the completion of the hypoxia recovery measurements. Since these flies had only a short period to equilibrate in the chambers before the first metabolic measurement was taken the initial metabolic rate data for this group probably overestimates the actual initial metabolic rate (Van Voorhies et al., 2004).

#### Recovery from anoxia

After being exposed to approximately 5 h of graded hypoxic conditions flies were reintroduced to normoxic conditions by adding room air into the mixing flask. The flies were then directly exposed to an increase in O<sub>2</sub> concentration. This increased the  $P_{O_2}$  of the airstream to 2 kPa within 1 min and to 16 kPa within 3 min. The metabolic rate (calculated as the amount of CO<sub>2</sub> produced) of the flies was then recorded for an additional 4 h period. These data were used to plot the metabolic recovery of flies exposed to hypoxia.

#### Respiratory quotient measurements

Respiratory quotients (RQ) were determined for flies while exposed to hypoxia, during recovery from hypoxia, and in hyperoxia, using a Sable Systems PA-1 paramagnetic O<sub>2</sub> analyzer and a Li-Cor 6262 gas analyzer. For the RQ experiments flies were sealed in chambers with a defined predetermined O<sub>2</sub> concentration. The chambers were filled and resampled from cylinders containing pressurized mixes of air of defined O<sub>2</sub> concentrations and scrubbed of CO<sub>2</sub>. At the end of the sampling interval the chamber was flushed at a known rate with the same gas mixture that was used to fill the chamber. The bolus of CO<sub>2</sub>-enriched/O<sub>2</sub>-depleted air was flushed into the CO<sub>2</sub> and O<sub>2</sub> analyzers located downstream. Gas flow into the chamber was regulated with a mass flow controller located upstream of the chamber. The accuracy of the system was assessed through injection of known volumes of a calibration gas standard with defined amounts of CO<sub>2</sub> and N<sub>2</sub> and by calculating the RQ generated from the combustion of pure ethanol. Based on these methods the CO<sub>2</sub> and O<sub>2</sub> analyzers gave readings within 2% of the predicted values.

To determine if metabolic substrate utilization was altered in hypoxia, O<sub>2</sub> consumption and CO<sub>2</sub> production were measured in flies progressively exposed to O<sub>2</sub> tensions of 1.2, 0.8, 0.4, 0.2 kPa. O<sub>2</sub> consumption and CO<sub>2</sub> production were initially sampled at 1 h intervals. Because the metabolic rate of the hypoxic flies was greatly reduced, the sampling intervals were increased to 1.5 h during extreme hypoxia. For these measurements an average of approximately 75, 5- to 6-day-old post-emergent male and female flies were placed in 25 ml glass metabolic chambers. Five experimental groups were exposed to hypoxia, and three control groups exposed only to normoxic conditions. The amount of CO<sub>2</sub> produced and O<sub>2</sub> consumed was calculated using DATACAN software.

To determine if exposure to hypoxia induced a large O<sub>2</sub> debt which was repaid during hypoxic recovery, RQ values were

determined for flies after a 4 h exposure to 0.2 kPa O<sub>2</sub>. RQs were calculated on data from five groups of flies both during the hypoxic exposure and after the flies were in normoxic conditions for 0.5 and 1.5 h. The RQs of two groups of control flies that remained in normoxic conditions were also calculated.

RQ values of flies exposed to 100% O<sub>2</sub> for 24 h were calculated for six groups of flies each with equal numbers of males and females flies. RQs were calculated for these groups after 4, 7, 11 and 26 h.

#### Survival of flies in 0–19 kPa O<sub>2</sub>

To determine if survival varied between flies exposed to different hypoxic conditions groups of flies were subjected to O<sub>2</sub> levels of 0, 0.1, 0.2, 1.0 and 19 kPa (normal atmospheric O<sub>2</sub> concentration at the site of the experiments) for periods ranging from 2–16 h. Five separate groups of ~20 mixed-sex, flies were used for each time point and O<sub>2</sub> tension. The gas stream leading into the fly chambers were hydrated with glass syringes filled with water-saturated cotton wool that were preflushed with 99.999% N<sub>2</sub> for 48 h to purge O<sub>2</sub>. Gas mixtures were made by mixing N<sub>2</sub> with room air in a 20 l pressurized gas cylinder and assaying the final O<sub>2</sub> contents with a PA-1 O<sub>2</sub> analyzer. Gas mixes of different O<sub>2</sub> tensions entered the chambers at 20 ml min<sup>-1</sup> (STPD).

Control flies had a small amount of *Drosophila* instant food placed in the chamber with them. The other groups of flies were essentially immobilized during exposures and were incapable of feeding. For this reason no food was placed in these chambers. Previous experiments with this same strain of flies have shown that no mortality occurs in flies starved for 24 h. Chambers were kept at room temperature, which varied between 23 and 25°C as monitored with a Hobo data logger. Survival was assayed after allowing the hypoxia-exposed flies to recover in normoxia for up to 24 h.

#### Exposure to multiple hypoxic events

To determine if multiple, rapid exposure to hypoxia altered metabolic function, groups of flies were immobilized with a stream of humidified N<sub>2</sub> at a flow of 1 l min<sup>-1</sup> (STPD) until there was no detectable fly movement. This occurred within 15–20 s of exposure to the stream of N<sub>2</sub>. The chamber was then flushed with normoxic air at 100% RH until >90% of the flies were actively walking in the vial (typically ~2 min) and then immediately exposed to another anoxic event. Five groups of 12–15 flies were exposed to five such anoxic events while five groups of flies were exposed to 10 bouts of anoxia and reperfusion.

For each experiment there were three groups of ~15 control flies that were exposed to a single anoxic exposure equal in duration to the total time the cyclic groups were exposed. The time that the control groups were exposed to pure N<sub>2</sub> was 90 s for the groups exposed to five anoxic bouts and 180 s for groups exposed to 10 bouts. Flies exposed to cyclic anoxia were in a flowing gas stream for 11.5 to 23 min. This time included both the interval of the flushing with N<sub>2</sub> (1.5 or 3 min) plus the time that the chambers were flushed with normoxic air during the recovery period (10 or 20 min). To control for the potential effect of exposing flies to a moving air stream the flies in the control group were exposed to a normoxic flow of air of 1 l min<sup>-1</sup> for a period equal to that of the experimental group. Thus, both the experiment and control flies had equal time exposures to a flow of N<sub>2</sub> or a flow of air. At the end of the set of anoxic exposures the anoxic and control groups were sealed in 50 ml glass metabolic chambers with a small amount of food and placed in incubators at 24°C. The flies were allowed to recover in the chamber for 1 h before collecting CO<sub>2</sub> and O<sub>2</sub> data for the next 22 h

at a 1 h sampling interval for the first 6 h and every 2 h thereafter. After 22 h, CO<sub>2</sub> production from the food was measured and subtracted from the output.

#### Exposure to hyperoxia

Hyperoxia measurements were conducted under conditions similar to the hypoxic experiment except that flies were supplied with a small amount of sterile food. To avoid the potential confounding effect of the metabolic activity of eggs and larvae laid by female flies only male flies were used. For these measurements flies were immobilized with N<sub>2</sub> and placed in the metabolic chamber. After allowing the flies to equilibrate for 1 h in the chamber the metabolic rate of the flies in normoxia was recorded for 1.5 h to obtain a control metabolic rate. Gaseous 100% O<sub>2</sub> was mixed into a 2-l flask and then into 25 ml glass metabolic chambers containing an average of 20, 5-day-old male flies. The same flow rates, sampling intervals and humidification methods were used in the hyperoxia conditions as used in the hypoxia experiments.

The metabolic rate of the fly groups in 100% O<sub>2</sub> was recorded for a 24 h period. The flies were then exposed to normoxic conditions and their metabolic rate was recorded for another 2 h. The CO<sub>2</sub> output from the food was measured at the end of each experiment and subtracted from the final output to determine the final metabolic reading. The CO<sub>2</sub> contribution from the food was always a minor portion (<2%) of the total CO<sub>2</sub> output. The CO<sub>2</sub> production of the control flies continually maintained under normoxic conditions was measured several times during each experiment. Data were collected from measurements done on five separate occasions. Fly mortality was assayed several times during each experiment.

#### Effect of CO<sub>2</sub> sedation on metabolic function

To determine if the use of CO<sub>2</sub> to immobilize flies had a measurable effect on metabolic rate, groups of 20 flies were placed in 12 separate metabolic chambers divided between three groups: control flies, flies to be knocked out with CO<sub>2</sub>, and flies to be knocked out with N<sub>2</sub>. A baseline reading was taken after the flies were in the chambers for 20 min and then the chambers of the experimental groups were flushed with 100% humidified CO<sub>2</sub> or N<sub>2</sub> for 5 min at a flow of 200 ml min<sup>-1</sup> and then the chambers were sealed for 25 min. After being exposed to pure N<sub>2</sub> or CO<sub>2</sub> for ~30 min the chambers were flushed with normoxic air for 5 min. Three additional metabolic rate measurements were then taken of each group at 30 min intervals. To determine if high CO<sub>2</sub> levels would immobilize flies in the presence of normoxic O<sub>2</sub> levels a group of mixed-sex flies was exposed to a mixture of 20 kPa O<sub>2</sub> and 80 kPa CO<sub>2</sub>.

#### Statistics

An ANOVA analysis (Statview 5.1) was used to determine at what O<sub>2</sub> level the metabolic rate was significantly reduced relative to normoxic levels. As O<sub>2</sub> tensions dropped below 0.7 kPa the rate of reduction in metabolic rate relative to the reduction in O<sub>2</sub> tension appeared to increase. To quantify this effect, the slopes were compared between the change in metabolic rate and O<sub>2</sub> tension, for O<sub>2</sub> tensions between 0.1–0.6 kPa and 0.7–3.1 kPa with a Student's *t*-test (Statview 5.1). Student's *t*-tests were also used to analyze for differences in RQ between flies in hypoxic or normoxic conditions and to compare the early metabolic recovery data from flies exposed to repeated hypoxic and reperfusion events. The data were analyzed for differences in survival with ANOVA. To determine if exposure to cyclic anoxia influenced the subsequent metabolic rate, data were analyzed for differences in metabolic rate using repeated-measures ANOVA (Statview 5.1).

## RESULTS

### Exposure to graded hypoxia

The metabolic rate of flies exposed to graded hypoxia remained relatively unchanged until an O<sub>2</sub> tension of ~3.1 kPa ( $P=0.015$ ,  $F=2.6$ ,  $d.f.=9$ ), whereupon it decreased in an approximately linear manner until the O<sub>2</sub> partial pressure reached 0.6 kPa (Fig. 1A). The rate of metabolic depression relative to the decrease in O<sub>2</sub> tension was more pronounced as O<sub>2</sub> tensions were reduced from 0.6 kPa to anoxia (Fig. 1B). The average slope of the line between these O<sub>2</sub> tensions increased more than fourfold relative to the slope of the line between 0.7 and 3.1 kPa, a highly significant difference ( $P\leq 0.001$ ,  $t=11.1$ ,  $d.f.=10$ ). The metabolic rates of the flies in extreme hypoxia are at least an order of magnitude lower than under normoxic conditions. The O<sub>2</sub> tension at which fly metabolic rate was reduced to 50% of normoxic levels was 1.0 kPa.

Flies exposed to hypoxia followed a characteristic set of behaviors. They initially rested quietly on the sides or ends of the chamber. At an O<sub>2</sub> tension of approximately 3 kPa the flies became more agitated and began actively walking around the chambers. As the O<sub>2</sub> tension dropped below around 2 kPa the flies moved to the bottom of the chamber where they stood with greatly reduced movement. Fly movement decreased even more as the O<sub>2</sub> tension dropped to around 1.4 kPa but the flies still maintained an upright position. At O<sub>2</sub> tensions below ~0.8 kPa all of the flies were completely immobile and were lying on their sides. All flies survived exposure to several hours of hypoxic conditions and >99% of the flies were alive 15 h after the end of the exposure to hypoxia.

### Recovery from anoxia

The metabolic rate of flies exposed to 5 h of graded hypoxia, including 45 min of anoxia, quickly returned to near pre-hypoxic levels after reintroduction of normoxic conditions (Fig. 1C). Within 5 min of being exposed to normoxia the metabolic rate of the flies increased almost 10-fold compared with their lowest hypoxic value. Despite the rapid recovery in metabolic rate, it typically took at least 30 min of normoxic flow before the first flies began to move and close to an hour for all the flies in a group to recover. During this recovery period the metabolic rate of the flies was around 50% higher than flies in 1.4 kPa O<sub>2</sub>, an O<sub>2</sub> tension at which flies are still capable of activity.

### Respiratory quotient

The RQ of flies in normoxia was near 0.95, a value consistent with other measurements of *Drosophila* RQ (Van Voorhies et al., 2004). The RQ of flies exposed to O<sub>2</sub> tensions between 1.2 and 0.2 kPa increased to between 1.11 and 1.39 (Fig. 1D). Such increases in RQ are probably caused by a hypoxia-induced increase in anaerobic metabolism. The RQ of flies in 0.2 kPa O<sub>2</sub> was significantly higher than flies in normoxia ( $P=0.003$ ,  $t=4.15$ ,  $d.f.=8$ ). Because the RQ values were higher in more extreme hypoxia, the use of CO<sub>2</sub> to measure metabolic rate is a conservative estimation of the metabolic depression that occurs in very hypoxic conditions.

The post-hypoxic RQ of flies during the first 30 min of the recovery period averaged 0.91 [ $\pm 0.01$  (s.e.m.)  $N=5$ ]. The RQ increased slightly, but significantly ( $P=0.004$ ,  $t=4.0$ ,  $d.f.=8$ ), during the 60–90 min recovery period to 0.98 ( $\pm 0.02$ ,  $N=5$ ). The RQ of the two control groups was 0.87 and 0.90 for these two time periods. The RQ of flies in 100% O<sub>2</sub> for 24 h was constant [ $0.96\pm 0.01$  (mean  $\pm$  s.e.m.)  $N=24$ ] over the four sample intervals. The maintenance of this high RQ value over this period indicates that the flies were feeding during the entire time they were exposed to 100% O<sub>2</sub>. There was no difference in RQ between the male and female flies.

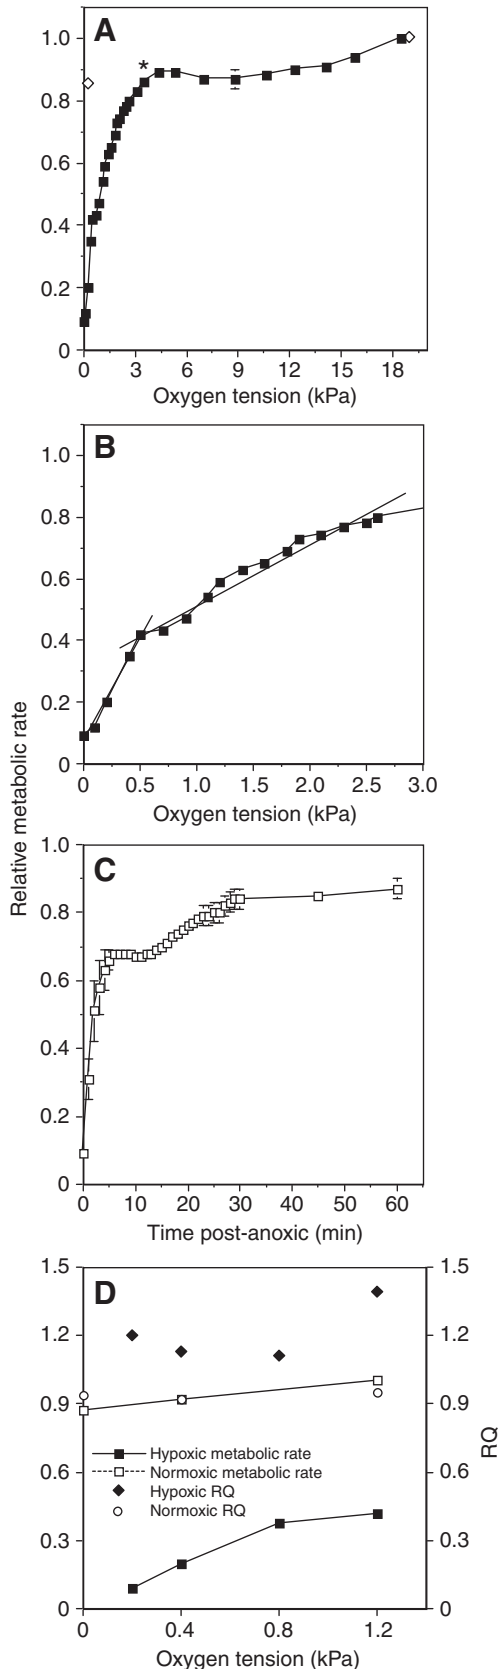

#### Survival in 0–19 kPa O<sub>2</sub>

All flies were dead after a 16h exposure to anoxia (Fig. 2). Flies survived slightly better at 1 kPa but still did far worse than normoxic

flies. There was generally a direct correlation between the O<sub>2</sub> tension and survival. Survival of flies remained high (>75%) in hypoxia, up to 4h exposure, but dropped rapidly with longer exposures. Around 10% of the flies in 1 kPa O<sub>2</sub> group showed slight movement (e.g. twitching), whereas all the other groups of flies were immobile within a few minutes of exposure to the lowered O<sub>2</sub> tensions. Flies were much slower to recover from hypoxia of longer than 2h and often were not moving after 1h in normoxia.

Fig. 1. Effect of reduced O<sub>2</sub> levels on *D. melanogaster* metabolic rate (measured as CO<sub>2</sub> production). The metabolic response to hypoxia data are from metabolic rates determined at 28 different O<sub>2</sub> tensions measured in six independent groups of flies. Data are means ± s.e.m. (A) metabolic rates at O<sub>2</sub> tensions ranging from normoxia to 0 kPa. The asterisk indicates when metabolic rate is first significantly reduced compared with normoxia, and the open symbols are the metabolic rate of control groups not exposed to hypoxia. (B) The lower range of the same data plotted at higher resolution. The two lines are the average change in metabolic rate for O<sub>2</sub> tensions between 0.1 and 0.6 kPa, and 0.7 and 3.1 kPa. The equation describing the relationship between relative metabolic rate and O<sub>2</sub> tension in extreme hypoxia is:  $MR=0.75x+0.04$ ,  $r^2=0.94$ ; and for less extreme hypoxia  $MR=0.16x+0.4$ ,  $r^2=0.83$ , with  $x$  as the  $P_{O_2}$ . (C) Recovery of fly metabolic rate after exposure to anoxia. (D) The RQ (respiratory quotient) and relative metabolic rate of flies progressively exposed to O<sub>2</sub> tensions of 1.2, 0.8, 0.4, 0.2 kPa. Open symbols are the relative metabolic rate and RQ of flies maintained in normoxic conditions. Data are from five groups of flies exposed to hypoxia and three control groups.

#### Multiple exposure to hypoxia

Exposure to multiple hypoxic and anoxic events did not have a significant long-term effect on metabolic rate or respiratory quotients, although it did cause a short-term depression in metabolic rate (Fig. 3A,B). Metabolic rate varied significantly over the sampling interval for groups exposed to five and 10 anoxic bouts ( $P<0.001$  for the 5× anoxic group and 10× hypoxic groups). With the exception of the first sample, there were no significant differences between the metabolic rates of the control groups and the cyclic anoxic groups for each time point ( $P=0.99$  for the 5× anoxic group and  $P=0.13$  for the 10× hypoxic groups). The initial metabolic rate of the group exposed to 10 cyclic anoxic events was reduced significantly compared with the control groups for the first reading ( $P=0.05$ ,  $t=2.41$ , d.f.=6). There were no deaths in either the control or cyclic groups over 24h, and feeding state of the groups recovering from the cyclic hypoxia treatment did not appear altered as the RQ remained near 1.00.

#### Hyperoxia results

There were essentially no differences in metabolic rate between the normoxic group and groups exposed to 100% O<sub>2</sub> (Fig. 4). All flies in both the hyperoxia and control groups were alive at the end of 8h and after 24h 97% of the flies in hyperoxia and control groups were alive. Two of the 100% O<sub>2</sub> groups had ~15% mortality after 24h. To avoid the potentially complicating problem of this high mortality rate these groups were excluded from the analysis.

#### Recovery of metabolic rate in CO<sub>2</sub>- and N<sub>2</sub>-immobilized flies

At the end of the sample period the flies in all of the groups were alive. After 24h, 99% of the control group was alive, and 90% of the N<sub>2</sub> and CO<sub>2</sub> groups were alive. The metabolic rate of flies exposed to pure N<sub>2</sub> remained constant over the entire sample period relative to the starting metabolic rate. Flies exposed to pure CO<sub>2</sub> for 30min did not show a subsequent reduction in metabolic rate over a 2h period (Fig. 5), and if anything the metabolic rate of this

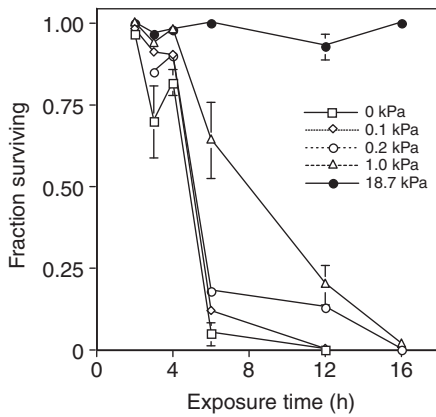

Fig. 2. The effect of time of exposure to reduced oxygen tensions on *D. melanogaster* survival. Values are means  $\pm$  s.e.m.,  $N=5$  for each time point.

group was elevated, but not significantly, compared with the control group ( $P=0.06$ ,  $t=3.1$ , d.f.=3). Flies exposed to an atmosphere of 20%  $O_2$  and 80%  $CO_2$  were completely immobilized within 1 min of exposure to the gas mixture.

## DISCUSSION

### Graded hypoxia of 19–0 kPa $O_2$

*D. melanogaster* maintains a near constant metabolic rate as  $O_2$  tensions were reduced from normoxic levels to approximately 3 kPa – an  $O_2$  tension equivalent to being at an altitude twice that of the summit of Mount Everest (Denny, 1993). Maintaining normal metabolic function at this low  $O_2$  tension is remarkable by mammalian standards. However, several factors, including having low resting metabolic rates relative to maximal metabolic rates and the presence of highly efficient gas exchange systems, pre-adapt insects to low critical  $O_2$  tensions (Greenlee and Harrison, 1998).

The critical  $O_2$  tensions ( $P_c$ ) in resting *D. melanogaster* would be expected to be low since the metabolic rate of flies at rest or walking is a small fraction of flight metabolic rate. Flight increases metabolic rate approximately tenfold in *D. melanogaster* (Lehmann et al., 2000) and can increase it by >50-fold in other insects (Harrison et al., 2001). As such, the high apparent safety margin for  $O_2$  delivery in resting insects may be greatly reduced or nonexistent during flight (Harrison et al., 2001; Harrison et al., 2006; Heymann and Lehmann, 2006). Consistent with this prediction, *D. repleta* does not fly at  $O_2$  tensions below 6 kPa and flight activity is reduced in *D. melanogaster* placed in an altitudinal equivalent of 7 kPa  $O_2$  (Chadwick and Gilmour, 1940; Dillon and Frazier, 2006).

The critical  $O_2$  tension of an organism provides a useful estimate of the point at which its metabolic function may be limited by rates of gas exchange, and to predict the hypoxia tolerance of an organism (Herreid, 1980; Holter and Spangenberg, 1997; Loudon, 1989).  $P_c$  for insects typically range between 1–5 kPa. Higher  $P_c$  values are more common in larger insects and are probably a result of increased diffusional distances (Loudon, 1988). Previous studies have reported  $P_c$ s for *Drosophila* ranging from 1.6 to 2.8 kPa (Greenlee and Harrison, 1998; Loudon, 1988). Many invertebrates respond to hypoxia by reducing metabolic rates, but in mammals a reduction in metabolic rate in response to hypoxia only occurs in smaller species such as rats (Korducki et al., 1994).

Although measures of an organism's  $P_c$  are valuable, this value does not have a precise set-point (Frazier et al., 2001). Factors such as experimental and growth temperature, activity level and

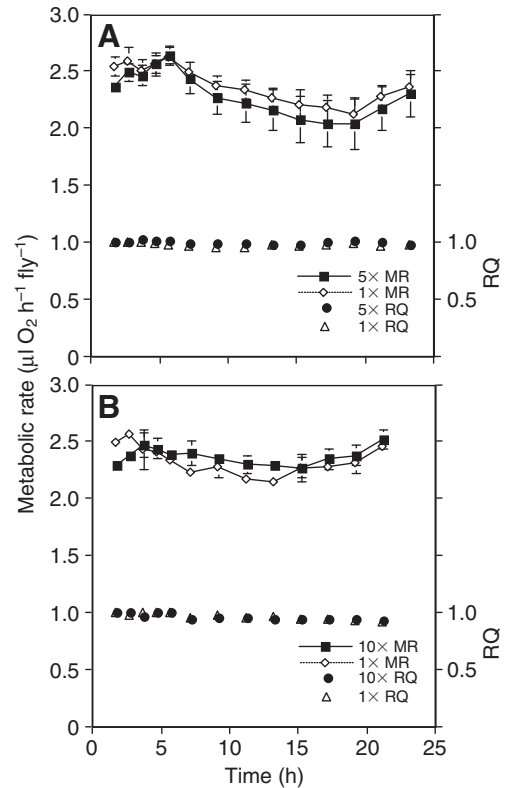

Fig. 3. The effect of multiple hypoxic–reperfusion events on the subsequent metabolic rate (MR) and respiratory quotient (RQ) in *D. melanogaster*. (A) Recovery MR and RQ of groups of flies exposed to either a single period of hypoxia or five periods of hypoxia and normoxia. (B) Recovery MR and RQ of groups of flies exposed to either a single period of hypoxia or 10 periods of hypoxia and normoxia. Values are means  $\pm$  s.e.m.

developmental stage all affect  $P_c$  values (Herreid, 1980; Lighton, 2007; Morris and Taylor, 1985). It also is apparent that insects reared at reduced  $O_2$  tensions well above levels that reduce metabolic rate can still show physiological alterations compared with those reared in normoxia. Placing *D. melanogaster* embryos at  $O_2$  tensions of 5 kPa increases the expression level of hypoxia inducible factors (Teodoro and O'Farrell, 2003). Although the  $P_c$  for adult *D. melanogaster* is around 3 kPa, flies reared at 10 kPa had reduced growth rates, smaller adult body size, and higher mortality than normoxic counterparts (Frazier et al., 2001). Similarly, beetle larvae (*Tebebrio molitor*) reared at 11 kPa  $O_2$ , an  $O_2$  tension above its  $P_c$ , grew more slowly, had increased mortality and an altered sex ratio than larvae reared at 15 or 21 kPa  $O_2$  (Loudon, 1988).

As  $O_2$  tensions decreased below 3 kPa the metabolic rate of *D. melanogaster* showed an approximately linear rate of decrease until  $\sim 0.7$  kPa. Below this point there was a sharp decrease in the metabolic rate relative to the reduction in  $O_2$  tension. If the only factor limiting respiration in hypoxia was the rate of gas diffusion, the rate of decrease in metabolic rate should remain linear as  $O_2$  levels decrease. This suggests that the more rapid decrease in metabolic rate observed in very hypoxic conditions may be due to flies actively reducing metabolic rate in response to hypoxia. Hypoxia causes numerous changes in mitochondrial function that include opening of mitochondrial ion channels, and a reduction in mitochondrial complex IV cytochrome oxidase activity. Factors such as these may be responsible for the increased depression of metabolic rate at very low

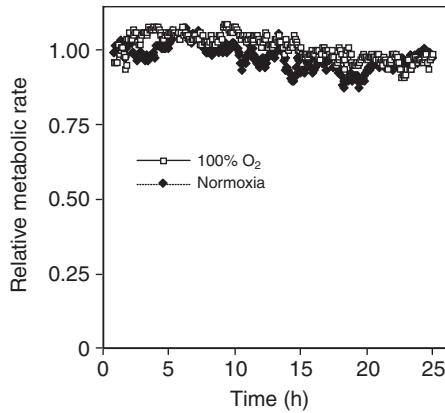

Fig. 4. The metabolic response of *D. melanogaster* to hyperoxia. Data are plotted at a 6 min resolution from five groups of flies exposed to 100% O<sub>2</sub> for 24 h and five groups of control flies exposed to normoxia. Values are means  $\pm$  s.e.m.

O<sub>2</sub> levels (Lahiri et al., 2005). Also there are proteins in *D. melanogaster* that appear to reduce metabolism under conditions of environmental stress (Teleman et al., 2005), and it is possible that such proteins could become more active under extreme hypoxia.

It also appears that the hypoxic response in *D. melanogaster* differs from that caused by the loss of cellular energy reserves caused by metabolic inhibitors such as cyanide (Teodoro and O'Farrell, 2003). This implies that the physiological response to hypoxia is not a simple passive consequence of the collapse of cellular energy reserves due to insufficient levels of O<sub>2</sub> to carry out oxidative phosphorylation. Regardless of the reasons, such a downregulation in metabolic rate should be adaptive for surviving hypoxia since suppression of energy turnover provides the greatest protection against hypoxia, and is critical to long-term anoxic survival (Arthur et al., 1997; Brooks and Storey, 1997; Hand, 1998; Hochachka et al., 1996).

#### Respiratory quotient during exposure to hypoxia

The RQ of flies exposed to O<sub>2</sub> tensions of  $\leq 1.2$  kPa increased to between 1.11 and 1.39, and is consistent with results from other animals exposed to hypoxia. For example, the RQ of rats (*Rattus norvegicus*) in hypoxia increased from 0.75 to 1.15 (Frappell et al., 1995) and the RQ of the leafroller moth (*Platynota stultana*) increased from around 0.75 in normoxia, to 1.3 in 1–2 kPa O<sub>2</sub> (Zhou et al., 2001). The most probable cause for this increase in RQ is an increased use of anaerobic metabolism in hypoxic conditions, but other factors, such as changes in acid–base balance, could also be responsible for these increased RQ values (Greenlee and Harrison, 1998). Although the rate of anaerobic metabolism may increase in flies exposed to hypoxia, this presumed increase in the rate of anaerobic metabolism was insufficient for the flies to maintain movement.

#### Metabolic recovery from hypoxia

In general, *D. melanogaster* flies tolerated hours of exposure to hypoxic and/or anoxic conditions with no apparent adverse effects. Unlike mammals, insects have the ability to spontaneously recover from extended periods of anoxia (Kolsch et al., 2002). The metabolic rate of hypoxia-exposed flies recovered to near pre-hypoxic levels within  $\sim 1$  h of being returned to normoxic conditions, even though exposure to hypoxic conditions reduced metabolic rates by more than an order of magnitude compared with normoxic levels. *D. melanogaster* can rapidly replenish ATP levels depleted by hypoxia. The ATP levels of *D. melanogaster* embryos exposed to 30 min of

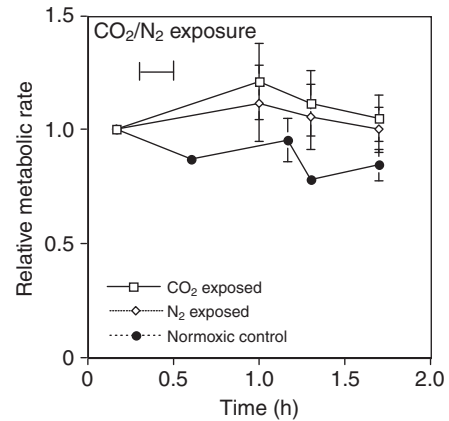

Fig. 5. The effect on relative metabolic rate of a 30 min exposure to 100% N<sub>2</sub> or CO<sub>2</sub>. Values are means  $\pm$  s.e.m. with four groups of flies in each treatment group.

extreme hypoxia ( $< 0.1$  kPa O<sub>2</sub>) declined to 38% of control levels, but recovered to 86% of pre-hypoxic treatment within 5 min of being placed in normoxia (DiGregorio et al., 2001). Other investigators have found that *D. melanogaster* recovers from anoxia as a non-linear function of exposure time, with  $> 2$  h of anoxia causing a disproportionate increase in recovery time (Krishnan et al., 1997).

There was no indication of either a large metabolic overshoot or a major alteration in RQ in flies recovering from hypoxia. The metabolic response of *D. melanogaster* during hypoxia recovery is consistent with that of many invertebrates that do not show an apparent O<sub>2</sub> debt during recovery from hypoxia. The lack of an alteration in the RQ of *D. melanogaster* is also consistent with the general observation that insects make minimal use of anaerobic metabolism when exposed to hypoxia (Kolsch et al., 2002; Wegener and Moratzky, 1995). The increase in O<sub>2</sub> consumption seen in some animals after exposure to hypoxia or anoxia is primarily due to increased energy demands for the removal of anaerobic end products and recharging of the phosphagen and ATP pools (Ellington, 1983).

#### Hypoxic and anoxic survival

The factors that allow *D. melanogaster* to survive several hours of exposure to hypoxic and/or anoxic conditions are not clear. Insects possess very efficient respiratory systems and appear to seldom function anaerobically (Wegener, 1996). An argument could be made that since insects are rarely exposed to hypoxic conditions at the cellular level, they would be poorly adapted to survive severe hypoxia. This pattern is seen in organisms such as birds and mammals that rely on aerobic metabolism for the bulk of their metabolic demands. These animals can suffer irreparable damage after more than a few minutes of anoxia (Chapman et al., 2002; Hermes-Lima and Zenteno-Savin, 2002).

A general requirement for surviving hypoxia is having both a low initial metabolic rate and the ability to greatly reduce metabolic rate in hypoxia. Turtles, *Chrysemys picta*, are an example of this. Anoxic survival is temperature dependent with turtles surviving for 12 h at 20°C, but 90 days at 3°C. This difference in survival is thought to be mediated by a temperature-induced reduction in metabolic rate at lower temperature (Jackson, 2000). In contrast to the low metabolic rate of turtles, the mass-specific metabolic rate of non-flying *D. melanogaster* is well above the maximal metabolic rate recorded in human elite athletes (Coyle, 2005),

leading to the prediction that they would have a limited ability to survive hypoxia.

The response of *Drosophila* to anoxia is similar to mammals, in that both show a rapid loss of muscle control and are quickly immobilized. The difference is that *Drosophila* can survive in this state for hours whereas mammals suffer irreversible damage after a few minutes of anoxia (Gu and Haddad, 1999). Among the factors potentially responsible for the survival of *Drosophila* in hypoxia is the ability of *Drosophila* neurons (unlike mammals) to become hyperpolarized in hypoxia. This reduces neuron excitability and may save energy (Gu and Haddad, 1999).

Although *D. melanogaster* is very tolerant of short-term hypoxia, exposure to hypoxic conditions for periods longer than a few hours rapidly increased mortality. There was typically a linear relationship between O<sub>2</sub> tension and survival. A similar result has been reported for *D. melanogaster* embryos, with embryos dying more quickly in 1 kPa than 2 kPa O<sub>2</sub> (DiGregorio et al., 2001). Anoxic conditions were the most stressful, and survival of this group was reduced compared with the hypoxic groups for all but the 2 h exposures. This contrasts with survival of hypoxic conditions in the nematode *Caenorhabditis elegans* in which embryos exposed to anoxia survive longer than embryos exposed to hypoxia (Nystul and Roth, 2004). The ability to withstand hypoxic and/or anoxic conditions also varies with the developmental state. Adult flies exposed to anoxia do not survive >12 h, but embryos can survive at least 36 h of anoxia with nearly 100% survival (DiGregorio et al., 2001; Foe and Alberts, 1985).

The survival of flies in hypoxia decreased rapidly after >4 h exposure, a finding reported by other investigators (Chen et al., 2002). This increase in mortality may be caused by large increases in protein aggregation which increased over 4-fold after 4 h of anoxia (Chen et al., 2002). The survival of *D. melanogaster* in hypoxia is comparable with that of other insects. Hypoxia and anoxia tolerance in insects varied widely from an LT<sub>50</sub> of 1.5 h for the yellow-fever mosquito (*Aedes aegypti*) to 36 h for a flour beetle (*Tribolium confusum*) (Knipling et al., 1961). Locusts (*Locusta migratoria*) survive up to 4 h of anoxia, and hawk moths (*Manduca sexta*) up to 24 h (Wegener and Moratzky, 1995).

#### Multiple exposures of flies to hypoxia

With the exception of the first metabolic reading, no significant differences were apparent between the recovery metabolic rate or RQ of flies exposed to multiple bouts of anoxia, and exposure to a single anoxic episode. This result is unexpected because it has been well demonstrated that fluctuating hypoxia can increase production of mitochondrial reactive oxygen species (ROS) by up to 10-fold (Chandel and Schumacker, 2000; Drew et al., 2002; Guzy et al., 2005; Mansfield et al., 2005; Michiels et al., 2002). These ROS bursts produce DNA damage that can lead to mitochondrial apoptosis (Wyllie, 1997). Additionally in mammals, hypoxic-reperfusion events increase levels of neuronal nitric oxide synthase and generation of nitric oxide, which causes mitochondrial dysfunction (Vannucci and Hagberg, 2004). Because ROS formation can only occur in hypoxic, not anoxic conditions, once a cell is anoxic formation of ROS should be minimal, and cycling in and out of anoxia should be far more damaging than a single anoxic-reperfusion event.

Although there was no evidence from this study that anoxic-reperfusion events had a long-term effect on metabolic function, a study by Lighton and Schilman (Lighton and Schilman, 2007) found that O<sub>2</sub> reperfusion events did cause a significant reduction in recovery metabolic rates in *D. melanogaster*. The factor that appears responsible for the difference between these two studies is the amount of time that the flies were exposed to anoxia. In this

study the flies were in anoxic conditions for between 1.5 and 3 min whereas in the study by Lighton and Schilman flies were exposed to anoxia for 7.5 to 120 min before reperfusion occurred. The shorter anoxic exposure time used in this study was probably below the level that would induce mitochondrial damage and cause a reduction in metabolic rate. It is also worth noting that in this study the group of flies exposed to 10 cycles of anoxic reperfusion did have a significantly reduced metabolic rate compared with the control group for the first recovery metabolic rate.

#### Effects of 100% O<sub>2</sub> on metabolic rate

Flies exposed to an environment of 100% O<sub>2</sub> for 24 h showed no apparent alteration in metabolic rate or RQ relative to flies in normoxic conditions. This result is unexpected. Studies in mammalian cells in culture have found that hyperoxia can inactivate many enzymes crucial to normal metabolic function (Gardner et al., 1994; Joenje, 1989). Functional consequences of such changes include protein misfolding, catalytic inactivation, the loss of protein functions and a reduction in the function of glycolysis and the tricarboxylic (TCA) acid cycle (Das et al., 2001; Schoonen et al., 1990; Yan et al., 1997; Yan and Sohal, 1998). Hyperoxia can also increase rates of oxidation of pyridine nucleotides (NAD and NADH), significantly increasing ROS production from mitochondria, as well as damage to mitochondria (Arthur et al., 1997; Gille and Joenje, 1992; Wispe et al., 1992). Many of these deleterious effects occur within a short time of exposure to hyperoxia (Das et al., 2001). Studies in insects have found that hyperoxia can cause a profound depression in metabolic rate. For example, the metabolic rate of army worm pupae (*Prodenia eridania*) exposed to hyperbaric hyperoxia was reduced 20- to 50-fold relative to normoxic controls (Clark and Cristofalo, 1960). Mammalian cell cultures exposed to hyperoxia also show large (approximately threefold) decreases in metabolic rate compared with normoxic cells (Schoonen et al., 1990).

It has generally been assumed that insects use tracheae and tracheoles to distribute gases directly to cells. As a result, O<sub>2</sub> tensions at the cell surface should closely mirror ambient O<sub>2</sub> tensions (Miquel et al., 1975; Mockett et al., 1999). However, one method by which flies could withstand a hyperoxia insult would be to limit spiracle opening to reduce gas flow (Hetz and Bradley, 2005). Several lines of evidence argue that this is not occurring in adult *Drosophila* exposed to hyperoxia. Many studies have used both direct microscopic examination and biochemical assays to demonstrate damage to many different internal cells types in *Drosophila* exposed to elevated O<sub>2</sub> tensions (Miquel et al., 1975; Philpott et al., 1974; Yan et al., 1997; Yan and Sohal, 1998). The deleterious effects of high O<sub>2</sub> levels can be seen after a few hours of exposure, and the mortality rate of *Drosophila* increases significantly after a 24 h exposure to hyperoxia (Das et al., 2001). Additionally, the high metabolic rate of *D. melanogaster*, even at rest, predicts that it should continually keep its spiracles at least partially opened to avoid a rapid build-up of CO<sub>2</sub> (Heymann and Lehmann, 2006; Lighton and Schilman, 2007). These factors do not support the hypothesis that flies are able to maintain low internal O<sub>2</sub> levels even in the face of high external O<sub>2</sub> tensions.

The RQ of flies exposed to 100% O<sub>2</sub> remained near 0.95 over the 24 h period of the measurements, which is essentially the same as normoxic controls. Although there are examples of hyperoxia inhibiting carbohydrate metabolism (Haugaard, 1968), the maintenance of this high RQ indicates that the flies were actively feeding and using carbohydrates as their main metabolic substrate. It is not clear how *D. melanogaster* sustains the damage that is



expected to be caused by hyperoxia and still maintains a normal metabolic rate. It is possible that reduction in metabolic rate is not seen because the standard metabolic rate of the flies is much less than flight metabolic rate.

#### Recovery of metabolic rate in CO<sub>2</sub> or N<sub>2</sub> immobilized flies

Exposing *D. melanogaster* for 30 min to either pure N<sub>2</sub> or CO<sub>2</sub> had relatively minor effects on the metabolic rate of the flies during recovery. The limited effect of N<sub>2</sub> exposure on the subsequent metabolic rate of flies is consistent with data showing that the metabolic rate of flies exposed to graded hypoxia quickly recovers to pre-exposure levels when placed in normoxic conditions (Van Voorhies et al., 2004) (and this study).

It is more surprising that a 30 min exposure to pure CO<sub>2</sub> did not cause a subsequent reduction in metabolic rate. Unlike N<sub>2</sub>, the anesthetic effect of CO<sub>2</sub> is caused by factors other than CO<sub>2</sub> simply displacing O<sub>2</sub> and producing anoxic conditions (Badre et al., 2005). *D. melanogaster* exposed to a mixture of 20% O<sub>2</sub> and 80% CO<sub>2</sub> were quickly immobilized, even though O<sub>2</sub> tensions were far higher than required for normal movement. Additionally, exposing *Drosophila* to elevated CO<sub>2</sub> levels has many effects including influencing gene expression levels, reducing longevity and fecundity, and affecting mating behavior (Barron, 2000; Leenders and Beckers, 1972; Perron et al., 1972).

Studies in other insects have shown that even low levels of CO<sub>2</sub> can also have large effects on insect respiration. Honeybees (*Apis mellifera*) exposed to CO<sub>2</sub> levels of a few percent showed a significant inhibition of succinic dehydrogenase, a critical enzyme of the Krebs TCA cycle (Seeley, 1960). The metabolic rate of lepidopteran pupae (*Platynota stultana*) placed in an atmosphere containing >20% CO<sub>2</sub> was reduced up to 80% compared with CO<sub>2</sub>-free air, even when 21% O<sub>2</sub> was present (Zhou et al., 2001). In view of the potent effects of CO<sub>2</sub> on the physiology of flies it could be reasonably predicted that exposure to pure CO<sub>2</sub> would have some effect on the metabolic rate of flies recovering from this exposure. However, at least in the short term, no such effect was detected.

#### Conclusion

A notable feature of this study is the quantification of the remarkable ability of *D. melanogaster* to maintain or recovery normal metabolic function in the face of numerous environmental insults such as exposure over many hours to anoxic, hypoxic, pure O<sub>2</sub> or CO<sub>2</sub> environments and multiple episodes of hypoxia–normoxic reperfusion. Exposing most mammals, including humans, to such conditions would result in death or greatly compromise metabolic function.

Discussions with M. Bernstein, J. Graham and J. Williams and two anonymous reviewers helped greatly with this manuscript. A. Khazaeli and J. Curtsinger provided valuable advice on *Drosophila* rearing techniques. This research was supported by a grant from the US National Cancer Institute (MSI CCP NCI U56 CA96286) and by the US NIH. Deposited in PMC for release after 12 months.

#### REFERENCES

Arthur, P. G., Franklin, C. E., Cousins, K. L., Thorarensen, H., Hochachka, P. W. and Farrell, A. P. (1997). Energy turnover in the normoxic and anoxic turtle heart. *Comp. Biochem. Physiol.* **117A**, 121-126.

Badre, N. H., Martin, M. E. and Cooper, R. L. (2005). The physiological and behavioral effects of carbon dioxide on *Drosophila melanogaster* larvae. *Comp. Biochem. Physiol. A Mol. Integr. Physiol.* **140**, 363-376.

Barron, A. B. (2000). Anaesthetising *Drosophila* for behavioural studies. *J. Insect Physiol.* **46**, 439-442.

Baumgartl, H., Kritzler, K., Zimelka, W. and Zinkler, D. (1994). Local PO<sub>2</sub> measurements in the environment of submerged soil microarthropods. *Acta Oecol.* **15**, 781-789.

Bickler, P. E., Fahlman, C. S. and Ferrero, D. M. (2004). Hypoxia increases calcium flux through cortical neuron glutamate receptors via protein kinase C. *J. Neurochem.* **88**, 878-884.

Bishop, T., Lau, K. W., Epstein, A. C., Kim, S. K., Jiang, M., O'Rourke, D., Pugh, C. W., Gleadle, J. M., Taylor, M. S., Hodgkin, J. et al. (2004). Genetic analysis of pathways regulated by the von Hippel-Lindau tumor suppressor in *Caenorhabditis elegans*. *PLoS Biol.* **2**, E289.

Boutillier, R. G. and St Pierre, J. (2002). Adaptive plasticity of skeletal muscle energetics in hibernating frogs: mitochondrial proton leak during metabolic depression. *J. Exp. Biol.* **205**, 2287-2296.

Brooks, S. P. and Storey, K. B. (1997). Glycolytic controls in estivation and anoxia: a comparison of metabolic arrest in land and marine molluscs. *Comp. Biochem. Physiol.* **118A**, 1103-1114.

Centanin, L., Ratcliffe, P. J. and Wappner, P. (2005). Reversion of lethality and growth defects in Fatiga oxygen-sensor mutant flies by loss of hypoxia-inducible factor- $\alpha$ /Sima. *EMBO Rep.* **6**, 1070-1075.

Chadwick, L. and Gilmour, D. (1940). Respiration during flight in *Drosophila repleta* Wollaston: the oxygen consumption considered in relation to the wing-rate. *Physiol. Zool.* **13**, 398-410.

Chandel, N. S. and Schumacker, P. T. (2000). Cellular oxygen sensing by mitochondria: old questions, new insight. *J. Appl. Physiol.* **88**, 1880-1889.

Chapman, L. J., Chapman, C. A., Nordlie, F. G. and Rosenberger, A. E. (2002). Physiological refugia: swamps, hypoxia tolerance and maintenance of fish diversity in the Lake Victoria region. *Comp. Biochem. Physiol.* **133A**, 421-437.

Chen, L., Rio, D. C., Haddad, G. G. and Ma, E. (2004). Regulatory role of dADAR in ROS metabolism in *Drosophila* CNS. *Brain Res. Mol. Brain Res.* **131**, 93-100.

Chen, Q., Ma, E., Behar, K. L., Xu, T. and Haddad, G. G. (2002). Role of trehalose phosphatase synthase in anoxia tolerance and development in *Drosophila melanogaster*. *J. Biol. Chem.* **277**, 3274-3279.

Choi, D. W. (2005). Neurodegeneration: cellular defences destroyed. *Nature* **433**, 696-698.

Clark, A. M. and Cristofalo, V. J. (1960). Oxygen sensitivity in the insect *Prodenia eridania*. *Am. J. Physiol.* **198**, 441-444.

Clegg, J. S. (1997). Embryos of *Artemia franciscana* survive four years of continuous anoxia: the case for complete metabolic rate depression. *J. Exp. Biol.* **200**, 467-475.

Coyle, E. F. (2005). Improved muscular efficiency displayed as Tour de France champion matures. *J. Appl. Physiol.* **98**, 2191-2196.

Das, N., Levine, R. L., Orr, W. C. and Sohal, R. S. (2001). Selectivity of protein oxidative damage during aging in *Drosophila melanogaster*. *Biochem. J.* **360**, 209-216.

Dayan, F., Roux, D., Brahimi-Horn, M. C., Pouyssegur, J. and Mazure, N. M. (2006). The oxygen sensor factor-inhibiting hypoxia-inducible factor-1 controls expression of distinct genes through the bifunctional transcriptional character of hypoxia-inducible factor-1 $\alpha$ . *Cancer Res.* **66**, 3688-3698.

Denny, M. (1993). *Air And Water: The Biology and Physics of Life's Media*. Princeton, NJ: Princeton University Press.

DiGregorio, P. J., Ubersax, J. A. and O'Farrell, P. H. (2001). Hypoxia and nitric oxide induce a rapid, reversible cell cycle arrest of the *Drosophila* syncytial divisions. *J. Biol. Chem.* **276**, 1930-1937.

Dillon, M. E. and Frazier, M. R. (2006). *Drosophila melanogaster* locomotion in cold thin air. *J. Exp. Biol.* **209**, 364-371.

Douglas, R. M., Xue, J., Chen, J. Y., Haddad, C. G., Alper, S. L. and Haddad, G. G. (2003). Chronic intermittent hypoxia decreases the expression of Na/H exchangers and HCO<sub>3</sub>-dependent transporters in mouse CNS. *J. Appl. Physiol.* **95**, 292-299.

Drew, K. L., Toien, O., Rivera, P. M., Smith, M. A., Perry, G. and Rice, M. E. (2002). Role of the antioxidant ascorbate in hibernation and warming from hibernation. *Comp. Biochem. Physiol.* **133C**, 483-492.

Drew, M. C. (1992). Soil aeration and plant root metabolism. *Soil Sci.* **154**, 259-268.

Ellenby, C. (1953). Oxygen consumption and cell size: a comparison of the rate of oxygen consumption of diploid and triploid prepupae of *Drosophila melanogaster* Meigen. *J. Exp. Biol.* **30**, 475-491.

Ellington, W. R. (1983). The recovery from anaerobic metabolism in invertebrates. *J. Exp. Zool.* **228**, 431-444.

Epstein, A. C., Gleadle, J. M., McNeill, L. A., Hewitson, K. S., O'Rourke, J., Mole, D. R., Mukherji, M., Metzzen, E., Wilson, M. I., Dhanda, A. et al. (2001). *C. elegans* EGL-9 and mammalian homologs define a family of dioxygenases that regulate HIF by prolyl hydroxylation. *Cell* **107**, 43-54.

Fenchel, T. and Finlay, B. J. (1995). *Ecology and Evolution in Anoxic Worlds*. Oxford: Oxford University Press.

Fenn, W. O., Henning, M. and Philpott, M. (1967). Oxygen poisoning in *Drosophila*. *J. Gen. Physiol.* **50**, 1693-1707.

Foe, V. E. and Alberts, B. M. (1985). Reversible chromosome condensation induced in *Drosophila* embryos by anoxia: visualization of interphase nuclear organization. *J. Cell Biol.* **100**, 1623-1636.

Frappell, P., Westwood, K. and Maskrey, M. (1995). Ventilatory and metabolic responses to hypoxia during moderate hypothermia in anesthetized rats. *J. Appl. Physiol.* **79**, 256-260.

Frazier, M. R., Woods, H. A. and Harrison, J. F. (2001). Interactive effects of rearing temperature and oxygen on the development of *Drosophila melanogaster*. *Physiol. Biochem. Zool.* **74**, 641-650.

Gardner, P. R., Nguyen, D. D. and White, C. W. (1994). Aconitase is a sensitive and critical target of oxygen poisoning in cultured mammalian cells and in rat lungs. *Proc. Natl. Acad. Sci. USA* **91**, 12248-12252.

Gille, J. P. and Joenje, H. (1992). Cell culture models for oxidative stress: superoxide and hydrogen peroxide versus normobaric hyperoxia. *Mutat. Res.* **275**, 405-414.

Greenlee, K. J. and Harrison, J. F. (1998). Acid–base and respiratory responses to hypoxia in the grasshopper *Schistocerca americana*. *J. Exp. Biol.* **201**, 2843-2855.

Gu, X. Q. and Haddad, G. G. (1999). *Drosophila* neurons respond differently to hypoxia and cyanide than rat neurons. *Brain Res. Mol. Brain Res.* **845**, 6-13.

- Guzy, R. D., Hoyos, B., Robin, E., Chen, H., Liu, L., Mansfield, K. D., Simon, M. C., Hammerling, U. and Schumacker, P. T. (2005). Mitochondrial complex III is required for hypoxia-induced ROS production and cellular oxygen sensing. *Cell Metab.* **1**, 401-408.
- Haddad, G. G. (2006). Tolerance to low O<sub>2</sub>: lessons from invertebrate genetic models. *Exp. Physiol.* **91**, 277-282.
- Hairston, N. G., Van Brunt, R. A. and Kearns, C. M. (1995). Age and survivorship of diapausing eggs in a sediment egg bank. *Ecology* **76**, 1706-1711.
- Hand, S. C. (1998). Quiescence in *Artemia franciscana* embryos: reversible arrest of metabolism and gene expression at low oxygen levels. *J. Exp. Biol.* **201**, 1233-1242.
- Hand, S. C. and Hardewig, I. (1996). Downregulation of cellular metabolism during environmental stress: mechanisms and implications. *Annu. Rev. Physiol.* **58**, 539-563.
- Harrison, J., Frazier, M. R., Henry, J. R., Kaiser, A., Klok, C. J. and Rascon, B. (2006). Responses of terrestrial insects to hypoxia or hyperoxia. *Respir. Physiol. Neurobiol.* **154**, 4-17.
- Harrison, J. F., Camazine, S., Marden, J. H., Kirkton, S. D., Rozo, A. and Yang, X. (2001). Mite not make it home: tracheal mites reduce the safety margin for oxygen delivery of flying honeybees. *J. Exp. Biol.* **204**, 805-814.
- Hauggaard, N. (1968). Cellular mechanisms of oxygen toxicity. *Physiol. Rev.* **48**, 311-371.
- Hermes-Lima, M. and Zenteno-Savin, T. (2002). Animal response to drastic changes in oxygen availability and physiological oxidative stress. *Comp. Biochem. Physiol.* **133C**, 537-556.
- Herreid, C. F. (1980). Hypoxia in invertebrates. *Comp. Biochem. Physiol.* **67A**, 311-320.
- Hetz, S. K. and Bradley, T. J. (2005). Insects breathe discontinuously to avoid oxygen toxicity. *Nature* **433**, 516-519.
- Heymann, N. and Lehmann, F. O. (2006). The significance of spiracle conductance and spatial arrangement for flight muscle function and aerodynamic performance in flying *Drosophila*. *J. Exp. Biol.* **209**, 1662-1677.
- Hoback, W. W. and Stanley, D. W. (2001). Insects in hypoxia. *J. Insect Physiol.* **47**, 533-542.
- Hochachka, P. W. (1980). *Living Without Oxygen*. Cambridge, MA: Harvard University Press.
- Hochachka, P. W. (1998). Mechanism and evolution of hypoxia tolerance in humans. *J. Exp. Biol.* **201**, 1243-1254.
- Hochachka, P. W., Buck, L. T., Doll, C. J. and Land, S. C. (1996). Unifying theory of hypoxia tolerance: molecular/metabolic defense and rescue mechanism for surviving oxygen lack. *Proc. Natl. Acad. Sci. USA* **93**, 9493-9498.
- Hochachka, P. W., Rupert, J. L., Goldenberg, L., Gleave, M. and Kozlowski, P. (2002). Going malignant: the hypoxia-cancer connection in the prostate. *BioEssays* **24**, 749-757.
- Holter, P. and Spangenberg, A. (1997). Oxygen uptake in coprophilous beetles (*Aphodius*, *Geotrupes*, *Sphaeridium*) at low oxygen and high carbon dioxide concentrations. *Physiol. Entomol.* **22**, 339-343.
- Jackson, D. C. (2000). Living without oxygen: lessons from the freshwater turtle. *Comp. Biochem. Physiol.* **125A**, 299-315.
- Jamieson, D. (1989). Oxygen toxicity and reactive oxygen metabolites in mammals. *Free Radic. Biol. Med.* **7**, 87-108.
- Jarecki, J., Johnson, E. and Krasnow, M. A. (1999). Oxygen regulation of airway branching in *Drosophila* is mediated by branchless FGF. *Cell* **99**, 211-220.
- Jensen, P. (1995). Life history of the nematode *Theristus anoxybiticus* from sublittoral muddy sediment at methane seepages in the northern Kattegat, Denmark. *Mar. Biol.* **123**, 131-136.
- Joenje, H. (1989). Genetic toxicology of oxygen. *Mutat. Res.* **219**, 193-208.
- Johansson, D., Nilsson, G., Ouml, and Rnblom, E. (1995). Effects of anoxia on oxygen metabolism in crucian carp brain slices studied with microcalorimetry. *J. Exp. Biol.* **198**, 853-859.
- Kaelin, W. G., Jr (2005). ROS: really involved in oxygen sensing. *Cell Metab.* **1**, 357-358.
- Knipling, G. D., Sullivan, W. N. and Fulton, R. A. (1961). The survival of several species of insects in a nitrogen atmosphere. *J. Econ. Entomol.* **54**, 1054-1055.
- Kolsch, G., Jakobi, K., Wegener, G. and Braune, H. J. (2002). Energy metabolism and metabolic rate of the alder leaf beetle *Agelastica alni* (L.) (Coleoptera, Chrysomelidae) under aerobic and anaerobic conditions: a microcalorimetric study. *J. Insect Physiol.* **48**, 143-151.
- Korducki, M. J., Forster, H. V., Lowry, T. F. and Forster, M. M. (1994). Effect of hypoxia on metabolic rate in awake ponies. *J. Appl. Physiol.* **76**, 2380-2385.
- Krishnan, S. N., Haddad, G. G., Wyman, R. J., Mohsenin, A. and Sun, Y. (1997). Behavioral and electrophysiologic responses of *Drosophila melanogaster* to prolonged periods of anoxia. *J. Insect Physiol.* **43**, 203-210.
- Lahiri, S., Roy, A., Baby, S. M., Hoshi, T., Semenza, G. L. and Prabhakar, N. R. (2005). Oxygen sensing in the body. *Prog. Biophys. Mol. Biol.* **91**, 249-286.
- Leenders, H. J. and Beckers, P. J. (1972). The effect of changes in the respiratory metabolism upon genome activity. A correlation between induced gene activity and an increase in activity of a respiratory enzyme. *J. Cell Biol.* **55**, 257-265.
- Lehmann, F., Dickinson, M. H. and Staunton, J. (2000). The scaling of carbon dioxide release and respiratory water loss in flying fruit flies (*Drosophila* spp.). *J. Exp. Biol.* **203**, 1613-1624.
- Lighton, J. R. and Schilman, P. E. (2007). Oxygen reperfusion damage in an insect. *PLoS ONE* **2**, e1267.
- Lighton, J. R. B. (2007). Hot hypoxic flies: whole-organism interactions between hypoxic and thermal stressors in *Drosophila melanogaster*. *J. Therm. Biol.* **32**, 134-143.
- Loudon, C. (1988). Development of *Tenebrio molitor* in low oxygen levels. *J. Insect Physiol.* **34**, 97-103.
- Loudon, C. (1989). Tracheal hypertrophy in mealworms: design and plasticity in oxygen supply systems. *J. Exp. Biol.* **147**, 217-235.
- Lutz, P. L. and Nilsson, G. E. (1997). Contrasting strategies for anoxic brain survival - glycolysis up or down. *J. Exp. Biol.* **200**, 411-419.
- Mansfield, K. D., Guzy, R. D., Pan, Y., Young, R. M., Cash, T. P., Schumacker, P. T. and Simon, M. C. (2005). Mitochondrial dysfunction resulting from loss of cytochrome c impairs cellular oxygen sensing and hypoxic HIF- $\alpha$  activation. *Cell Metab.* **1**, 393-399.
- Marcus, N. H., Lutz, R., Burnett, W. and Cable, P. (1994). Age, viability, and vertical distribution of zooplankton resting eggs from an anoxic basin: evidence of an egg bank. *Limnol. Oceanogr.* **39**, 154-158.
- Massabuau, J. C. (2003). Primitive, and protective, our cellular oxygenation status? *Mech. Ageing Dev.* **124**, 857-863.
- Michiels, C., Minet, E., Mottet, D. and Raes, M. (2002). Regulation of gene expression by oxygen: NF- $\kappa$ B and HIF-1, two extremes. *Free Radic. Biol. Med.* **33**, 1231-1242.
- Miquel, J., Lundgren, P. R. and Bensch, K. G. (1975). Effects of oxygen-nitrogen (1:1) at 760 Torr on the life span and fine structure of *Drosophila melanogaster*. *Mech. Ageing Dev.* **4**, 41-57.
- Mockett, R. J., Orr, W. C., Rahmander, J., Benes, J. J., Radyuk, S. N., Klochko, V. I. and Sohal, R. (1999). Overexpression of Mn-containing superoxide dismutase in transgenic *Drosophila melanogaster*. *Arch. Biochem. Biophys.* **371**, 260-269.
- Mockett, R. J., Orr, W. C., Rahmandar, J. J., Sohal, B. H. and Sohal, R. S. (2001). Antioxidant status and stress resistance in long- and short-lived lines of *Drosophila melanogaster*. *Exp. Gerontol.* **36**, 441-463.
- Morris, S. and Taylor, A. C. (1985). Oxygen consumption by *Palaemon elegans* (Rathke) in response to temperature change: a determinant of distribution. *Exp. Biol.* **44**, 255-268.
- Murphy, E. and Steenbergen, C. (2008). Mechanisms underlying acute protection from cardiac ischemia-reperfusion injury. *Physiol. Rev.* **88**, 581-609.
- Nystul, T. G. and Roth, M. B. (2004). Carbon monoxide-induced suspended animation protects against hypoxic damage in *Caenorhabditis elegans*. *Proc. Natl. Acad. Sci. USA* **101**, 9133-9136.
- Paget, T. A., Fry, M. and Lloyd, D. (1987). Effects of inhibitors on the oxygen kinetics of *Nippostrongylus brasiliensis*. *Mol. Biochem. Parasitology* **22**, 125-134.
- Perron, J. M., Huot, L., Corrivault, C. W. and Chawla, S. S. (1972). Effects of carbon dioxide anaesthesia on *Drosophila melanogaster*. *J. Insect Physiol.* **18**, 1869-1874.
- Philpott, D. E., Bensch, K. G. and Miquel, J. (1974). Life span and fine structural changes in oxygen-poisoned *Drosophila melanogaster*. *Aerosp. Med.* **45**, 283-289.
- Pouyssegur, J., Dayan, F. and Mazure, N. M. (2006). Hypoxia signalling in cancer and approaches to enforce tumour regression. *Nature* **441**, 437-443.
- Saraste, M. (1999). Oxidative phosphorylation at the fin de siecle. *Science* **283**, 1488-1493.
- Schoonen, W. G. E. J., Wanamarta, A. H., vander Klei-vanMoorsel, J. M., Jakobs, C. and Joenje, H. (1990). Hyperoxia-induced clonogenic killing of HeLa cells associated with respiratory failure and selective inactivation of Krebs cycle enzymes. *Mutat. Res.* **237**, 173-181.
- Seeley, T. (1960). Atmospheric carbon dioxide regulation in honey-bee (*Apis mellifera*) colonies. *J. Insect Physiol.* **20**, 2301-2305.
- Semenza, G. L. (2004). Hydroxylation of HIF-1: oxygen sensing at the molecular level. *Physiology (Bethesda)* **19**, 176-182.
- Smith, S. L. and Gottlieb, S. F. (1975). Effects of increased partial pressures of oxygen on the embryonic and post-embryonic development of *Drosophila melanogaster*. *Aviat. Space Environ. Med.* **46**, 161-169.
- Storey, K. B. and Storey, J. M. (1990). Metabolic rate depression and biochemical adaptation in anaerobiosis, hibernation and estivation. *Q. Rev. Biol.* **65**, 145-174.
- Taylor, A. C. and Moore, P. G. (1995). The burrows and physiological adaptations to a burrowing lifestyle of *Natatolana borealis* (Isopoda: Cirolanidae). *Mar. Biol.* **123**, 805-814.
- Teleman, A. A., Chen, Y. W. and Cohen, S. M. (2005). 4E-BP functions as a metabolic brake used under stress conditions but not during normal growth. *Genes Dev.* **19**, 1844-1848.
- Teodoro, R. O. and O'Farrell, P. H. (2003). Nitric oxide-induced suspended animation promotes survival during hypoxia. *EMBO J.* **22**, 580-587.
- Thompson, R. J., Zhou, N. and MacVicar, B. A. (2006). Ischemia opens neuronal gap junction hemichannels. *Science* **312**, 924-927.
- Van Voorhies, W. A., Khazaeli, A. A. and Curtsinger, J. W. (2004). Testing the "Rate of Living" model: further evidence that longevity and metabolic rate are not inversely correlated in *Drosophila melanogaster*. *J. Appl. Physiol.* **97**, 1915-1922.
- Vannucci, S. J. and Hagberg, H. (2004). Hypoxia-ischemia in the immature brain. *J. Exp. Biol.* **207**, 3149-3154.
- Wegener, G. (1996). Flying insects: model systems in exercise physiology. *Experientia* **52**, 404-412.
- Wegener, G. and Moratzky, T. (1995). Hypoxia and anoxia in insects: microcalorimetric studies on two species (*Locusta migratoria* and *Manduca sexta*) showing different degrees of anoxia tolerance. *Thermochimica Acta* **251**, 209-218.
- Wilson, M., Widdicombe, J. H., Gohil, K., Burtis, K. C., Reznick, A. Z., Cross, C. E. and Eiserich, J. P. (2005). Are *Drosophila* a useful model for understanding the toxicity of inhaled oxidative pollutants: a review. *Inhal. Toxicol.* **17**, 765-774.
- Wispe, J. R., Warner, B. B., Clark, J. C., Dey, C. R., Neuman, J., Glasser, S. W., Crapo, J. D., Chang, L. Y. and Whitsett, J. A. (1992). Human Mn-superoxide dismutase in pulmonary epithelial cells of transgenic mice confers protection from oxygen injury. *J. Biol. Chem.* **267**, 23937-23941.
- Wyllie, A. (1997). Clues in the p53 murder mystery. *Nature* **389**, 237-238.
- Yan, L., Levine, R. L. and Sohal, R. S. (1997). Oxidative damage during aging targets mitochondrial aconitase. *Proc. Natl. Acad. Sci. USA* **94**, 11168-11172.
- Yan, L. J. and Sohal, R. S. (1998). Mitochondrial adenine nucleotide translocase is modified oxidatively during aging. *Proc. Natl. Acad. Sci. USA* **95**, 12896-12901.
- Yun, Z., Maecker, H. L., Johnson, R. S. and Giaccia, A. J. (2002). Inhibition of PPAR gamma 2 gene expression by the HIF-1-regulated gene DEC1/Str13: a mechanism for regulation of adipogenesis by hypoxia. *Dev. Cell* **2**, 331-341.
- Zhou, S., Criddle, R. S. and Mitcham, E. J. (2001). Metabolic response of *Platynota stultana* pupae during and after extended exposure to elevated CO<sub>2</sub> and reduced O<sub>2</sub> atmospheres. *J. Insect Physiol.* **47**, 401-409.
